# Supplementary material for: Development of a Nanostructured Lipid Carrier (NLC) by a Low-Energy Method, Comparison of Release Kinetics and Molecular Dynamics Simulation
Source: PubMed Central journal article supplement (PMC8070589; doi:10.3390/pharmaceutics13040531), 2021-04-10
Supplement: pharmaceutics-13-00531-s001.pdf [file pharmaceutics-13-00531-s001.pdf]

# Supplementary materials: Development of a Nanostructured Lipid Carrier (NLC) by a low-Energy Method, Comparison of Release Kinetics and Molecular Dynamics Simulation

Andrea C. Ortiz, Osvaldo Yañez, Edison Salas-Huenuleo and Javier O. Morales

Table S1. Preliminary formulations leading to the selected NLC (%p/p) composition. In blue is the selected formulation composition for the current investigation.

| Formulation | Gelucire® 44/14 | Tocopherol | Stearic acid | Oleic acid | Mygliol® 812 | Tween® 80 | Span® 20 | Water |
|-------------|-----------------|------------|--------------|------------|--------------|-----------|----------|-------|
| A1          | 5               | -----      | -----        | 0.5        | -----        | -----     | 3.5      | 91    |
| A2          | 5               | -----      | -----        | 1          | -----        | 2         | -----    | 92    |
| A3          | 4               | -----      | -----        | 2.5        | -----        | 1.5       | 1        | 91    |
| A4          | 4               | -----      | -----        | 2          | -----        | -----     | 2        | 92    |
| A5          | 4               | 1          | -----        | 0.5        | -----        | 1.5       | -----    | 91    |
| A6          | 3               | 2          | -----        | 1          | -----        | 2         | -----    | 92    |
| A7          | 3               | 3          | -----        | 2          | -----        | 2         | 1        | 89    |
| A8          | 4               | -----      | -----        | -----      | 0.5          | 2.5       | -----    | 93    |
| A9          | 4               | -----      | -----        | -----      | 1            | 2         | -----    | 93    |
| A10         | 4               | -----      | -----        | -----      | 1.5          | 2.5       | 2        | 90    |
| A11         | 3               | -----      | 1            | -----      | 1            | 2         | -----    | 93    |
| A12         | 4               | -----      | 2            | -----      | 2            | -----     | 2        | 90    |

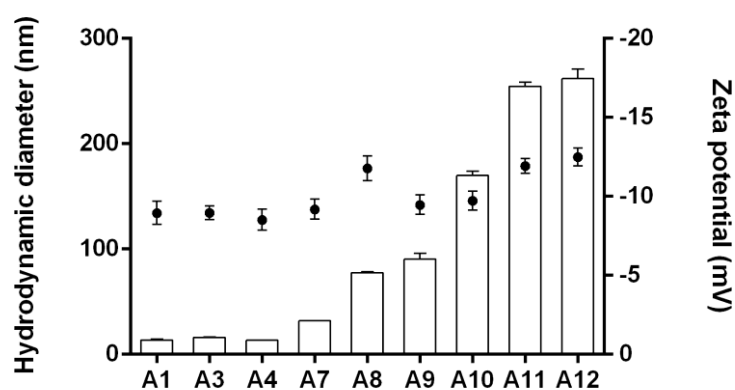

Figure S1. Hydrodynamic diameter (nm) and zeta potential of all formulation. The formulations not included in the figure were physically unstable.
